# Supplementary material
Source: PubMed Central journal article supplement (PMC6568255)
Supplement: NIHMS1027336-supplement-Supplemental.pdf [file NIHMS1027336-supplement-Supplemental.pdf]

In the format provided by the authors and unedited.

# Opportunities and challenges for a maturing science of consciousness

Matthias Michel<sup>1\*</sup>, Diane Beck<sup>2</sup>, Ned Block<sup>3</sup>, Hal Blumenfeld<sup>4</sup>, Richard Brown<sup>5</sup>, David Carmel<sup>6</sup>, Marisa Carrasco<sup>7</sup>, Mazviita Chirimuuta<sup>8</sup>, Marvin Chun<sup>9</sup>, Axel Cleeremans<sup>10</sup>, Stanislas Dehaene<sup>11,12</sup>, Stephen M. Fleming<sup>13\*</sup>, Chris Frith<sup>13</sup>, Patrick Haggard<sup>14</sup>, Biyu J. He<sup>15</sup>, Cecilia Heyes<sup>16</sup>, Melvyn A. Goodale<sup>17</sup>, Liz Irvine<sup>18</sup>, Mitsuo Kawato<sup>19</sup>, Robert Kentridge<sup>20</sup>, Jean-Remi King<sup>21,22</sup>, Robert T. Knight<sup>23</sup>, Sid Kouider<sup>24</sup>, Victor Lamme<sup>25</sup>, Dominique Lamy<sup>26</sup>, Hakwan Lau<sup>27,28,29\*</sup>, Steven Laureys<sup>30</sup>, Joseph LeDoux<sup>31</sup>, Ying-Tung Lin<sup>32</sup>, Kayuet Liu<sup>33</sup>, Stephen L. Macknik<sup>34</sup>, Susana Martinez-Conde<sup>34</sup>, George A. Mashour<sup>35</sup>, Lucia Melloni<sup>36</sup>, Lisa Miracchi<sup>37</sup>, Myrto Mylopoulos<sup>38</sup>, Lionel Naccache<sup>39</sup>, Adrian M. Owen<sup>40</sup>, Richard E. Passingham<sup>41</sup>, Luiz Pessoa<sup>42</sup>, Megan A. K. Peters<sup>43</sup>, Dobromir Rahnev<sup>44</sup>, Tony Ro<sup>45</sup>, David Rosenthal<sup>46</sup>, Yuka Sasaki<sup>47</sup>, Claire Sergent<sup>48</sup>, Guillermo Solovey<sup>49</sup>, Nicholas D. Schiff<sup>50</sup>, Anil Seth<sup>51</sup>, Catherine Tallon-Baudry<sup>52</sup>, Marco Tamietto<sup>53,54</sup>, Frank Tong<sup>55</sup>, Simon van Gaal<sup>56</sup>, Alexandra Vlassova<sup>57</sup>, Takeo Watanabe<sup>58</sup>, Josh Weisberg<sup>59</sup>, Karen Yan<sup>60</sup> and Masatoshi Yoshida<sup>61</sup>

<sup>1</sup>Department of Philosophy, Sorbonne Université, Paris, France. <sup>2</sup>Department of Psychology and Beckman Institute, University of Illinois at Urbana-Champaign, Champaign, Illinois, USA. <sup>3</sup>Department of Philosophy, New York University, New York, New York, USA. <sup>4</sup>Department of Neurology, Yale University School of Medicine, New Haven, Connecticut, USA. <sup>5</sup>Philosophy Program, LaGuardia Community College, The City University of New York, Long Island City, New York, USA. <sup>6</sup>School of Psychology, Victoria University of Wellington, Wellington, New Zealand. <sup>7</sup>Department of Psychology and Center for Neural Science, New York University, New York, New York, USA. <sup>8</sup>Department of History and Philosophy of Science, University of Pittsburgh, Pittsburgh, Pennsylvania, USA. <sup>9</sup>Department of Psychology, Yale University, New Haven, Connecticut, USA. <sup>10</sup>Center for Cognition & Neurosciences, Université libre de Bruxelles, Bruxelles, Belgium. <sup>11</sup>Chair of Experimental Cognitive Psychology, Collège de France, Paris, France. <sup>12</sup>Cognitive Neuroimaging Unit, Commissariat à l'Énergie Atomique et aux Énergies Alternatives (CEA), INSERM, Université Paris-Sud, Université Paris-Saclay, NeuroSpin center, Gif/Yvette, France. <sup>13</sup>Wellcome Centre for Human Neuroimaging, University College London, London, UK. <sup>14</sup>Institute of Cognitive Neuroscience, University College London, London, UK. <sup>15</sup>Neuroscience Institute, New York University Langone Medical Center, New York, New York, USA. <sup>16</sup>All Souls College and Department of Experimental Psychology, University of Oxford, Oxford, UK. <sup>17</sup>The Brain and Mind Institute, The University of Western Ontario, London, ON, Canada. <sup>18</sup>School of Philosophy, Cardiff University, Cardiff, UK. <sup>19</sup>Department of Decoded Neurofeedback, Computational Neuroscience Laboratories, Advanced Telecommunications Research Institute International, Kyoto, Japan. <sup>20</sup>Department of Psychology, University of Durham, Durham, UK. <sup>21</sup>Department of Psychology, New York University, New York, New York, United States. <sup>22</sup>Frankfurt Institute for Advanced Studies, Frankfurt, Germany. <sup>23</sup>Helen Wills Neuroscience Institute, University of California, Berkeley, USA. <sup>24</sup>Brain and Consciousness group (ENS, EHESS, CNRS), Département d'Études Cognitives, École Normale Supérieure - PSL Research University, Paris, France. <sup>25</sup>Amsterdam Brain and Cognition, Department of Psychology, University of Amsterdam, Amsterdam, The Netherlands. <sup>26</sup>School of Psychological Sciences, Tel Aviv University, Tel Aviv, Israel. <sup>27</sup>Department of Psychology and Brain Research Institute, UCLA, Los Angeles, USA. <sup>28</sup>Department of Psychology, University of Hong Kong, Hong Kong, China. <sup>29</sup>State Key Laboratory of Brain and Cognitive Sciences, HKU, Hong Kong, China. <sup>30</sup>Coma Science Group, GIGA Consciousness, University of Liège, Liège, Belgium. <sup>31</sup>Center for Neural Science, New York University, New York, New York, USA. <sup>32</sup>Institute of Philosophy of Mind and Cognition, National Yang-Ming University, Taipei, Taiwan. <sup>33</sup>Department of Sociology, UCLA, Los Angeles, California, USA. <sup>34</sup>State University of New York, Downstate Medical Center, Brooklyn, New York, USA. <sup>35</sup>Center for Consciousness Science, Department of Anesthesiology, University of Michigan, Ann Arbor, Michigan, USA. <sup>36</sup>Department of Neurology, NYU School of Medicine, New York, New York, USA. <sup>37</sup>Department of Philosophy, University of Pennsylvania, Philadelphia, Pennsylvania, USA. <sup>38</sup>Department of Philosophy and Institute of Cognitive Science, Carleton University, Ottawa, Ontario, Canada. <sup>39</sup>PICNIC Lab ICM INSERM, U1127 Paris, France. <sup>40</sup>The Brain & Mind Institute, Western University, London, Ontario, Canada. <sup>41</sup>Department of Experimental Psychology, University of Oxford, Oxford, UK. <sup>42</sup>Department of Psychology, University of Maryland, College Park, Maryland, USA. <sup>43</sup>Department of Bioengineering, University of California, Riverside, California, USA. <sup>44</sup>School of Psychology, Georgia Institute of Technology, Atlanta, Georgia, USA. <sup>45</sup>Psychology and Biology, Graduate Center, City University of New York, New York, New York, USA. <sup>46</sup>Philosophy and Cognitive Science, Graduate Center, City University of New York, New York, New York, USA. <sup>47</sup>Department of Cognitive, Linguistic and Psychological Sciences, Brown University, Providence, Rhode Island, USA. <sup>48</sup>Laboratoire Psychologie de la Perception, Université Paris Descartes, CNRS, Paris, France. <sup>49</sup>Instituto de Cálculo, Facultad de Ciencias Exactas y Naturales, Universidad de Buenos Aires, Buenos Aires, Argentina. <sup>50</sup>Department of Neurology, Weill Cornell Medicine, New York, New York, USA. <sup>51</sup>Sackler Centre for Consciousness Science, University of Sussex, Brighton, UK. <sup>52</sup>Cognitive Neuroscience Laboratory, INSERM, École Normale Supérieure - PSL Research University, Paris, France. <sup>53</sup>Department of Medical and Clinical Psychology, Tilburg University, Tilburg, The Netherlands. <sup>54</sup>Department of Psychology, University of Torino, Torino, Italy. <sup>55</sup>Psychology Department, Vanderbilt University, Nashville, Tennessee, USA. <sup>56</sup>Department of Psychology, University of Amsterdam, Amsterdam, The Netherlands. <sup>57</sup>Donders Institute for Brain, Cognition, and Behaviour, Radboud University Nijmegen, Nijmegen, The Netherlands. <sup>58</sup>Department of Cognitive, Linguistic and Psychological Sciences, Brown University, Providence, Rhode Island, USA. <sup>59</sup>Department of Philosophy, University of Houston, Houston, Texas, USA. <sup>60</sup>Institute of Philosophy of Mind and Cognition, National Yang-Ming University, Taipei, Taiwan. <sup>61</sup>Department of System Neuroscience, National Institute for Physiological Sciences, Okazaki, Japan. \*e-mail: [matthias.michel.curtin@gmail.com](mailto:matthias.michel.curtin@gmail.com); [stephen.fleming@ucl.ac.uk](mailto:stephen.fleming@ucl.ac.uk); [hakwan@gmail.com](mailto:hakwan@gmail.com)

# Supplementary Notes

## Opportunities and Challenges for a Maturing Science of Consciousness

**Supplementary Note 1:** Data on the RDoC: <https://www.nimh.nih.gov/research-priorities/rdoc/index.shtml>

**Supplementary Note 2:** Using <http://psychjobsearch.wikidot.com>, since 2007, many job ads mention “neuroeconomics” or “social neuroscience”, but there is no single job ad mentioning “consciousness” or “awareness”. For more about the job markets in neuroeconomics: <https://neuroeconomics.org/career/> and social neuroscience: <http://www.sciencemag.org/careers/2010/05/peering-inside-social-brain>

**Supplementary Note 3:** Projects funded by the European Research Council: <https://erc.europa.eu/projects-figures/erc-funded-projects>. Between 2007 and 2017, 22 grants on a total of 8,962 grants have been awarded to projects related to consciousness (including 2 projects on the sense of agency) by the ERC. In total, 0.25% of ERC grants are attributed to the study of consciousness. These grants were awarded for projects related to the contents of consciousness rather than states of consciousness.

**Supplementary Note 4:** See NIH Research Portfolio Online Reporting Tools (RePORT): <https://projectreporter.nih.gov/reporter.cfm> and NSF Award Search: <https://www.nsf.gov/awardsearch/>. Based on data from the NIH RePORT, between 2007 and 2017, only 5 grants have been awarded for studying subjects related to contents of consciousness. Over the same period, the NIH has provided 103,280 grants. In total, 0.016% of NIH grants are attributed to the study of consciousness (i.e., states of consciousness or contents of consciousness).

**Supplementary Note 5:** Data can be found here: <https://projectreporter.nih.gov/reporter.cfm>. Between 2007 and 2017, 12 NIH grants have been attributed to study states of consciousness such as consciousness in epilepsy, recovery of consciousness after traumatic brain injury, consciousness and anesthesia, and various disorders of consciousness.
